# Supplementary material
Source: publisher figshare collection journal article supplement (https://karger.figshare.com/articles/dataset/_/6969929)

**Figure S1 - flowchart illustrating inclusions and exclusions of the study population**

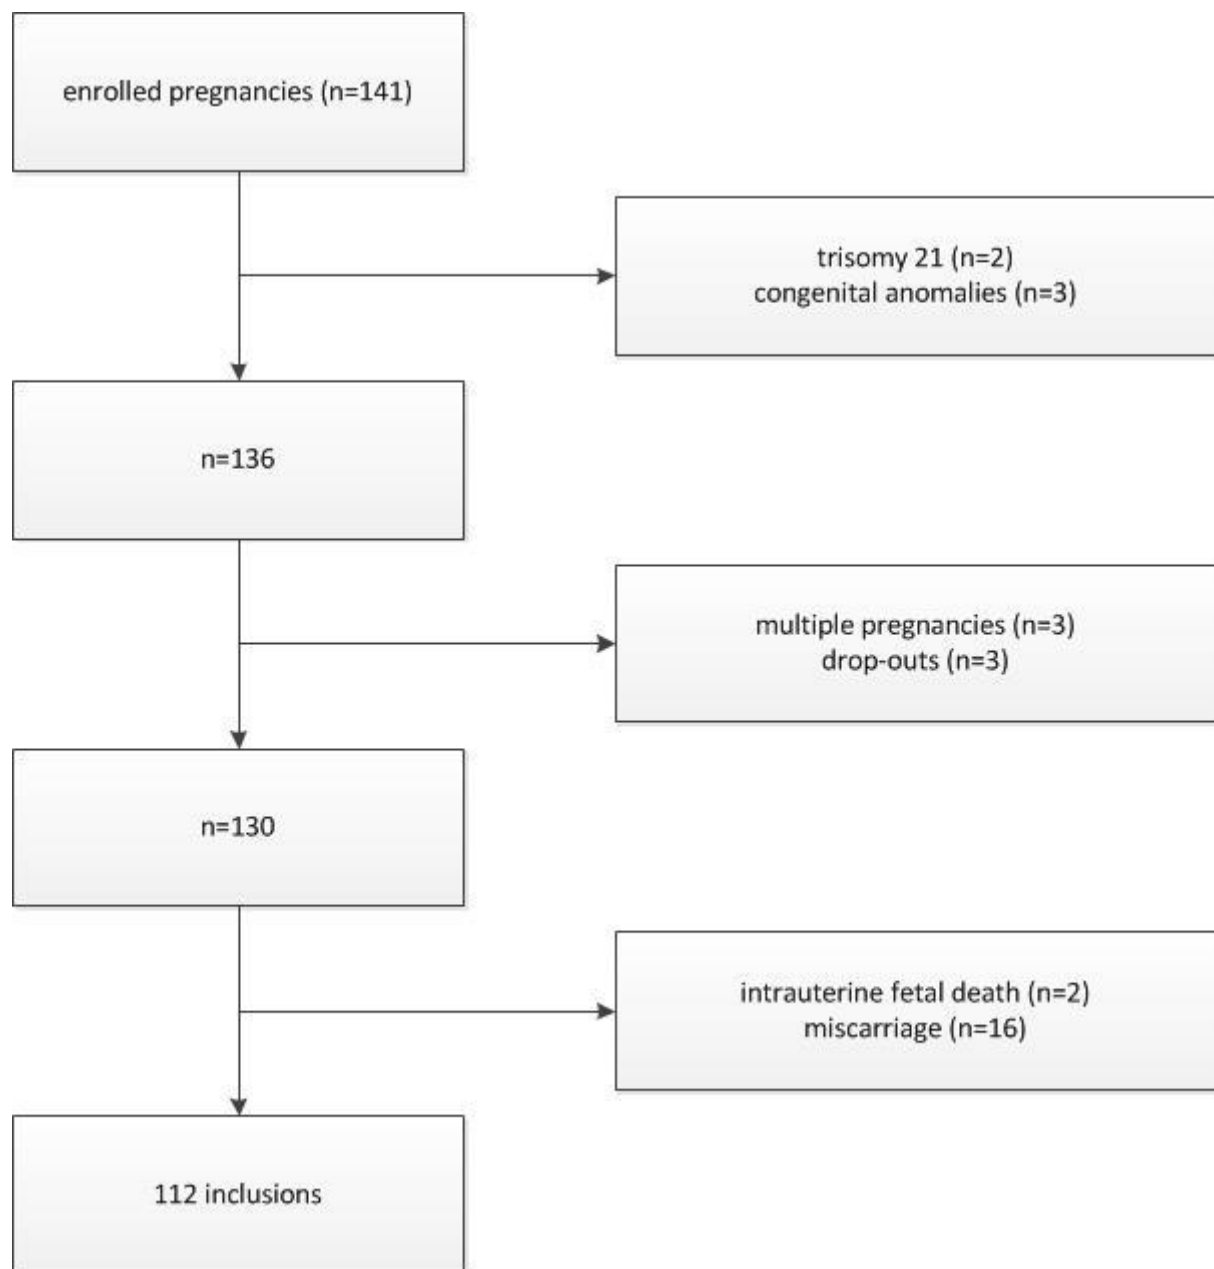

Supplement: Supplementary file 1 [file 1]
